# Supplementary material for: Plant Virus and Virus-like Disease Threats to Australia’s North Targeted by the Northern Australia Quarantine Strategy
Source: MDPI journal article supplement (doi:10.3390/plants10102175), 2021-10-14
Supplement: s1 [file s1]

## Supplementary tables

**Table S1. Legume samples collected and indexed negative for the peanut stripe strain of bean common mosaic virus in PNG and Far North Queensland, Australia**

| Collection No. | Legume                                                | Symptoms <sup>A</sup> | Location <sup>B</sup> | Potyvirus ELISA <sup>C</sup> | BCMV ELISA <sup>D</sup> | RT-PCR/sequence analysis <sup>E</sup> |
|----------------|-------------------------------------------------------|-----------------------|-----------------------|------------------------------|-------------------------|---------------------------------------|
| <b>PNG</b>     |                                                       |                       |                       |                              |                         |                                       |
| MPW1092        | <i>Vigna unguiculata</i><br><i>ssp. sesquipedalis</i> | YOGM                  | Kiunga, WP            | -                            | NT                      | NT                                    |
| MPW1024        | <i>Arachis hypogaea</i>                               | Chlorotic mottle      | Daru, WP              | -                            | NT                      | NT                                    |
| MPW1044        | <i>Arachis hypogaea</i>                               | Chlorotic mottle      | Nomad River, WP       | -                            | NT                      | NT                                    |
| MPW1045        | <i>Arachis hypogaea</i>                               | Chlorotic mottle      | Nomad River, WP       | -                            | NT                      | NT                                    |
| RID5119        | <i>Calopogonium mucunoides</i>                        | YOGM                  | Tiomini, Kiunga, WP   | -                            | NT                      | NT                                    |
| RID5120        | <i>Calopogonium mucunoides</i>                        | YOGM                  | Tiomini, Kiunga, WP   | -                            | NT                      | NT                                    |
| RID5036        | <i>Centrosema molle</i>                               | YOGM                  | Daru, WP              | -                            | NT                      | NT                                    |
| RID5040        | <i>Centrosema molle</i>                               | YOGM                  | Daru, WP              | -                            | NT                      | NT                                    |
| RID5129        | <i>Arachis hypogaea</i>                               | Chlorotic streaks     | Debapari, WP          | -                            | NT                      | NT                                    |
| RID5160        | <i>Arachis hypogaea</i>                               | Chlorotic marking     | Ningerum, WP          | -                            | NT                      | NT                                    |
| RID5436        | <i>Calopogonium mucunoides</i>                        | YOGM                  | Somboi, SP            | -                            | NT                      | NT                                    |
| RID5471        | <i>Calopogonium mucunoides</i>                        | YOGM                  | Blackwater, SP        | -                            | NT                      | NT                                    |
| RID5494        | <i>Calopogonium mucunoides</i>                        | YOGM                  | Vanimu, SP            | -                            | NT                      | NT                                    |
| RID5501        | <i>Calopogonium mucunoides</i>                        | YOGM                  | Lowau, ESP            | -                            | NT                      | NT                                    |
| RID5560        | <i>Centrosema molle</i>                               | YOGM                  | Zenag, MoP            | -                            | NT                      | NT                                    |
| RID5577        | <i>Centrosema molle</i>                               | YOGM                  | Ramu Valley, MoP      | -                            | NT                      | NT                                    |
| RID6619        | <i>Arachis hypogaea</i>                               | Chlorotic marking     | Aiyura, EHP           | -                            | -                       | NT                                    |
| RID6620        | <i>Arachis hypogaea</i>                               | Chlorotic             | Aiyura, EHP           | -                            | -                       | NT                                    |

|         |                                                    |                    |                       |    |    |                                      |
|---------|----------------------------------------------------|--------------------|-----------------------|----|----|--------------------------------------|
|         |                                                    | marking            |                       |    |    |                                      |
| RID6626 | <i>Arachis hypogaea</i>                            | Chlorotic striping | Bena, EHP             | -  | -  | NT                                   |
| RID6634 | <i>Arachis hypogaea</i>                            | Chlorotic striping | Okiufa, EHP           | -  | -  | NT                                   |
| RID6643 | <i>Arachis hypogaea</i>                            | Chlorotic striping | Asaro River, EHP      | -  | -  | NT                                   |
| RID6646 | <i>Crotalaria micans</i>                           | Stripey YOGM       | Komunive, EHP         | +  | +  | Not peanut stripe group <sup>F</sup> |
| RID6664 | <i>Crotalaria micans</i>                           | YOGM / mottle      | Kundiawa, CP          | +  | +  | Not peanut stripe group <sup>F</sup> |
| RID6665 | <i>Crotalaria micans</i>                           | YOGM / GOYVB       | Kundiawa, CP          | +  | +  | Not peanut stripe group <sup>F</sup> |
| RID6666 | <i>Arachis hypogaea</i>                            | Chlorotic marking  | Kundiawa, CP          | -  | -  | NT                                   |
| RID6702 | <i>Arachis hypogaea</i>                            | Chlorotic mottle   | Gumanch, WHP          | -  | -  | NT                                   |
| RID7009 | <i>Phaseolus vulgaris</i>                          | Chlorotic marking  | Tabubil, WP           | -  | NT | NT                                   |
| RID7014 | <i>Arachis hypogaea</i>                            | GOYVB              | Tabubil, WP           | -  | NT | NT                                   |
| RID7027 | <i>Arachis hypogaea</i>                            | Chlorotic spots    | Ningerum, WP          | -  | NT | NT                                   |
| RID7029 | <i>Arachis hypogaea</i>                            | Chlorotic spots    | Ningerum, WP          | -  | NT | NT                                   |
| RID7033 | <i>Arachis hypogaea</i>                            | Chlorotic spots    | Kiunga, WP            | -  | NT | NT                                   |
| RID7040 | <i>Centrosema molle</i>                            | YOGM               | Kiunga, WP            | -  | NT | NT                                   |
| RID7051 | <i>Vigna unguiculata</i> ssp. <i>sesquipedalis</i> | YOGM               | Debepari, WP          | -  | NT | NT                                   |
| RID7053 | <i>Vigna unguiculata</i> ssp. <i>sesquipedalis</i> | Chlorotic spots    | Morehead, WP          | -  | NT | NT                                   |
| RID7066 | <i>Centrosema molle</i>                            | Chlorotic marking  | Daru, WP              | -  | NT | NT                                   |
| RID7079 | <i>Arachis hypogaea</i>                            | Chlorotic spots    | Daru, WP              | +m | -  | NT                                   |
| RID7743 | <i>Desmodium</i> sp.                               | YOGM, crinkle      | Bougainville Is. AROB | NT | NT | Unrelated potyvirus <sup>G</sup>     |
| RID7761 | <i>Arachis hypogaea</i>                            | Chlorosis          | Wewak, ESP            | -  | NT | NT                                   |
| RID8030 | <i>Arachis hypogaea</i>                            | YOGM, stripes      | Lae, MoP              | -  | NT | NT                                   |
| RID8040 | <i>Arachis hypogaea</i>                            | YOGM               | Lae, MoP              | -  | NT | NT                                   |
| RID8048 | <i>Arachis hypogaea</i>                            | YOGVB              | Lae, MoP              | -  | NT | NT                                   |

|                   |                                                       |                       |                          |    |    |                                         |
|-------------------|-------------------------------------------------------|-----------------------|--------------------------|----|----|-----------------------------------------|
| RID8062           | <i>Vigna unguiculata</i><br><i>ssp. sesquipedalis</i> | YOGM                  | Port Moresby,<br>NCD     | +  | NT | Not peanut<br>stripe group <sup>F</sup> |
| LMJ1081           | <i>Vigna unguiculata</i><br><i>ssp. sesquipedalis</i> | YOGM                  | Daru, WP                 | NT | NT | Unrelated<br>potyvirus <sup>G</sup>     |
| LMJ1224           | <i>Vigna unguiculata</i><br><i>ssp. sesquipedalis</i> | YOGM                  | Bougainville Is.<br>AROB | NT | NT | Not peanut<br>stripe group <sup>F</sup> |
| LMJ1233           | <i>Crotalaria</i> sp.                                 | YOGM                  | Bougainville Is.<br>AROB | NT | NT | Unrelated<br>potyvirus <sup>G</sup>     |
| LMJ1250           | <i>Vigna unguiculata</i><br><i>ssp. sesquipedalis</i> | YOGM                  | Bougainville Is.<br>AROB | NT | NT | Not peanut<br>stripe group <sup>F</sup> |
| LMJ1259           | <i>Vigna unguiculata</i><br><i>ssp. sesquipedalis</i> | YOGM                  | Bougainville Is.<br>AROB | +  | NT | Not peanut<br>stripe group <sup>F</sup> |
| LMJ1262           | <i>Calopogonium</i><br><i>mucunoides</i>              | N/A                   | Bougainville Is.<br>AROB | NT | NT | Unrelated<br>potyvirus <sup>G</sup>     |
| MA106             | <i>Vigna unguiculata</i><br><i>ssp. sesquipedalis</i> | NA                    | Old Mawatta,<br>WP       | NT | NT | Unrelated<br>potyvirus <sup>G</sup>     |
| <b>Queensland</b> |                                                       |                       |                          |    |    |                                         |
| LMJ254            | <i>Clitoria ternatea</i>                              | Chlorosis,<br>crinkle | Boigu Is., TS            | +  | +  | Not peanut<br>stripe group <sup>F</sup> |
| LMJ396            | <i>Calopogonium</i><br><i>mucunoides</i>              | YOGM                  | Aurukun, CYP             | -  | NT | NT                                      |
| RID6404           | <i>Calopogonium</i><br><i>mucunoides</i>              | YOGM                  | Weipa, CYP               | -  | NT | NT                                      |
| LMJ453            | <i>Clitoria ternatea</i>                              | YOGM                  | Boigu Is., TS            | +  | +  | Not peanut<br>stripe group <sup>F</sup> |
| RID6559           | <i>Vigna unguiculata</i><br><i>ssp. sesquipedalis</i> | YOGM                  | Thursday Is., TS         | -  | NT | NT                                      |
| LMJ487            | <i>Arachis pintoii</i>                                | YOGM                  | Cooktown, CYP            | +m | +  | Not peanut<br>stripe group <sup>F</sup> |
| RID6576           | <i>Chamaecrista</i><br><i>rotundifolia</i>            | YOGM                  | New Mapoon,<br>NPA       | -  | -  | NT                                      |
| RID6579           | <i>Flemingia</i><br><i>parviflora</i>                 | YOGM                  | Bamaga, NPA              | -  | -  | NT                                      |
| RID6592           | <i>Pueraria lobata</i>                                | YOGM                  | Mer Is., TS              | -  | -  | NT                                      |
| RID6604           | <i>Desmodium</i><br><i>tortuosum</i>                  | YOGM                  | Ugar Is., TS             | +  | +  | Not peanut<br>stripe group <sup>F</sup> |
| RID6614           | <i>Clitoria ternatea</i>                              | YOGM                  | Kerriri Is., TS          | +  | +  | Not peanut<br>stripe group <sup>F</sup> |
| RID6947           | <i>Crotalaria goreensis</i>                           | YOGM                  | Erub Is., TS             | +  | +  | Unrelated<br>potyvirus <sup>G</sup>     |
| RID6965           | <i>Chamaecrista</i><br><i>rotundifolia</i>            | YOGM                  | Bamaga, NPA              | +  | +  | Not peanut<br>stripe group <sup>F</sup> |

|         |                                                       |                      |                          |    |    |                                     |
|---------|-------------------------------------------------------|----------------------|--------------------------|----|----|-------------------------------------|
| RID6970 | <i>Vigna unguiculata</i><br><i>ssp. sesquipedalis</i> | YOGM                 | Injinoo, NPA             | -  | NT | NT                                  |
| LMJ540  | <i>Chamaecrista</i><br><i>rotundifolia</i>            | Chlorotic<br>marking | Mapoon, CYP              | -  | NT | NT                                  |
| LMJ542  | <i>Chamaecrista</i><br><i>rotundifolia</i>            | YOGM                 | Mapoon, CYP              | -  | NT | NT                                  |
| LMJ547  | <i>Calopogonium</i><br><i>mucunoides</i>              | Mosaic               | Weipa, CYP               | -  | NT | NT                                  |
| LMJ700  | <i>Vigna unguiculata</i><br><i>ssp. unguiculata</i>   | YOGM                 | Endeavour<br>valley, CYP | NT | NT | Unrelated<br>potyvirus <sup>G</sup> |
| LMJ701  | <i>Vigna unguiculata</i><br><i>ssp. unguiculata</i>   | YOGM                 | Endeavour<br>valley, CYP | NT | NT | Unrelated<br>potyvirus <sup>G</sup> |
| LMJ704  | <i>Chamaecrista</i><br><i>rotundifolia</i>            | YOGM                 | Bamaga, NPA              | NT | NT | -                                   |
| LMJ707  | <i>Chamaecrista</i><br><i>rotundifolia</i>            | YOGM                 | Bamaga, NPA              | NT | NT | -                                   |
| LMJ711  | <i>Chamaecrista</i><br><i>rotundifolia</i>            | YOGM                 | Bamaga, NPA              | NT | NT | Unrelated<br>potyvirus <sup>G</sup> |
| LMJ715  | <i>Vigna unguiculata</i><br><i>sesquipedalis</i>      | YOGM                 | Bamaga, NPA              | NT | NT | Unrelated<br>potyvirus <sup>G</sup> |
| LMJ716  | <i>Chamaecrista</i><br><i>rotundifolia</i>            | YOGM                 | Bamaga, NPA              | NT | NT | Unrelated<br>potyvirus <sup>G</sup> |
| LMJ722  | <i>Vigna unguiculata</i><br><i>sesquipedalis</i>      | Mild mosaic          | Seisia, NPA              | NT | NT | Unrelated<br>potyvirus <sup>G</sup> |
| LMJ737  | <i>Chamaecrista</i><br><i>rotundifolia</i>            | Mild mosaic          | Old Mapoon,<br>CYP       | NT | NT | -                                   |
| LMJ841  | <i>Vigna unguiculata</i><br><i>ssp. sesquipedalis</i> | YOGM,<br>distortion  | Thursday Is., TS         | NT | NT | Unrelated<br>potyvirus <sup>G</sup> |
| LMJ845  | <i>Clitoria ternatea</i>                              | YOGM                 | Erub Is., TS             | NT | NT | Unrelated<br>potyvirus <sup>G</sup> |
| LMJ848  | <i>Macroptilium</i><br><i>atropurpureum</i>           | YOGM                 | Kerriri Is. TS           | NT | NT | Unrelated<br>potyvirus <sup>G</sup> |
| LMJ858  | <i>Desmodium</i><br><i>scorpiurus</i>                 | Vein banding         | Ugar Is., TS             | NT | NT | Unrelated<br>potyvirus <sup>G</sup> |
| LMJ863  | <i>Clitoria ternatea</i>                              | Mild mosaic          | Boigu Is., TS            | NT | NT | Unrelated<br>potyvirus <sup>G</sup> |
| LMJ865  | <i>Desmodium</i><br><i>scorpiurus</i>                 | YOGM                 | Erub Is., TS             | NT | NT | Unrelated<br>potyvirus <sup>G</sup> |
| LMJ868  | <i>Macroptilium</i><br><i>atropurpureum</i>           | YOGM                 | Erub Is. TS              | NT | NT | Unrelated<br>potyvirus <sup>G</sup> |
| LMJ882  | <i>Clitoria ternatea</i>                              | YOGM                 | Iama Is., TS             | NT | NT | Unrelated<br>potyvirus <sup>G</sup> |

|         |                                                    |                       |                  |    |    |                                  |
|---------|----------------------------------------------------|-----------------------|------------------|----|----|----------------------------------|
| LMJ916  | <i>Chamaecrista rotundifolia</i>                   | Vein banding / mosaic | Bamaga, NPA      | NT | NT | -                                |
| LMJ1388 | <i>Desmodium tortuosum</i>                         | Vein clearing         | Warraber Is. TS  | -  | NT | NT                               |
| LMJ1416 | <i>Chamaecrista rotundifolia</i>                   | YOGM                  | Horn Is. TS      | NT | NT | -                                |
| SLP100  | <i>Vigna unguiculata</i> ssp. <i>sesquipedalis</i> | Light mosaic          | Bamaga, NPA      | -  | NT | NT                               |
| SLP180  | <i>Centrosema molle</i>                            | YOGM                  | Weipa, CYP       | NT | NT | Unrelated potyvirus <sup>G</sup> |
| RID7188 | <i>Desmodium tortuosum</i>                         | YOGM                  | Iama Is., TS     | NT | NT | Unrelated potyvirus <sup>G</sup> |
| RID7205 | <i>Erythrina insularis</i>                         | Downward leaf curl    | Warraber Is., TS | NT | NT | -                                |
| RID7927 | <i>Crotalaria goreensis</i>                        | YOGM                  | Kerriri Is., TS  | +  | NT | Unrelated potyvirus <sup>G</sup> |
| RID8208 | <i>Clitoria ternatea</i>                           | YOGM                  | Mabuiag Is., TS  | NT | NT | Unrelated potyvirus <sup>G</sup> |
| LMJ1401 | <i>Clitoria ternatea</i>                           | YOGM                  | Erub Is., TS     | NT | NT | Unrelated potyvirus <sup>G</sup> |
| LMJ1404 | <i>Macroptilium atropurpureum</i>                  | YOGM                  | Erub Is. TS      | NT | NT | Unrelated potyvirus <sup>G</sup> |
| LMJ1411 | <i>Centrosema molle</i>                            | YOGM, distortion      | Thursday Is., TS | NT | NT | Unrelated potyvirus <sup>G</sup> |
| LMJ1426 | <i>Clitoria ternatea</i>                           | Vein feathering       | Boigu Is., TS    | NT | NT | Unrelated potyvirus <sup>G</sup> |

<sup>A</sup>GOYVB: green on yellow vein banding, YOGM: yellow on green mosaic.

<sup>B</sup> AROB: Autonomous Region of Bougainville, CP: Chimbu Province, CYP: Cape York Peninsula, EHP: Eastern Highlands Province, ESP: East Sepik Province, MoP: Morobe Province, NCD: National Capital District, NPA: Northern Peninsula Area (of Cape York Peninsula), SP: Sandaun Province, TS: Torres Strait, WHP: Western Highlands Province, WP: Western Province.

<sup>C</sup>Leaf samples were screened by Plate Trapped Antigen Enzyme Linked Immunosorbent Assay (PTA-ELISA) [1] using Agdia (Elkhart Inc., USA) reagent sets for the potyvirus group. ELISA test results were considered positive (+) when absorbance readings (405nm) exceeded 3 x mean of healthy controls. ELISA test results were considered marginal positive (+m) when absorbance readings (405nm) were less than 3 x mean of healthy controls but exceeded 2 x mean of healthy controls.

<sup>D</sup>Leaf samples were screened by Plate Trapped Antigen Enzyme Linked Immunosorbent Assay (PTA-ELISA) [1] using Agdia (Elkhart Inc., USA) reagent sets for *Bean common mosaic virus* (BCMV). ELISA test results were considered positive (+) when absorbance readings (405nm) exceeded 3 x mean of healthy controls. NT: not tested.

<sup>E</sup> RNA extracts were used in potyvirus group specific Reverse Transcriptase Polymerase Chain Reactions (RT-PCRs) using the Qiagen One-Step RT-PCR Kit and primer pair MJ1/MJ2 [2] or primer pair MJ1/Poty1 [3]. PCR products of the

expected size were directly sequenced by the Australian Genome Research Facility and the resulting sequences were used for phylogenetic analysis. Some samples tested negative (-) by PCR only, and were not subject to serological testing.

<sup>F</sup>Bean common mosaic virus isolates that did not fall into the peanut stripe group when subjected to phylogenetic analysis, further identification work still in progress.

<sup>G</sup>Potyvirus that did not belong to the virus species, *Bean common mosaic virus* when subjected to phylogenetic analysis, further characterisation still in progress.

**Table S2. Sugarcane samples indexed negative for the Ramu stunt virus**

29

| Collection number | Approximate date | Approximate location <sup>A</sup> | Symptoms                            |
|-------------------|------------------|-----------------------------------|-------------------------------------|
|                   |                  | <b>PNG</b>                        |                                     |
| RID5032           | June 2008        | Daru, WP                          | Chlorotic mottle                    |
| RID5041           | June 2008        | Daru, WP                          | Strong chlorotic streaks at margins |
| RID5043           | June 2008        | Daru, WP                          | Strong chlorotic streaks            |
| RID5076           | June 2008        | Suki, WP                          | Diffuse chlorotic streaks           |
| RID5910           | Nov. 2010        | Bougainville, AROB                | Fiji leaf gall only <sup>B</sup>    |
| RID5882           | Nov. 2010        | Buka, AROB                        | Fiji leaf gall only                 |
| RID5883           | Nov. 2010        | Buka, AROB                        | Fiji leaf gall only                 |
| RID5926           | Nov. 2010        | Huris, Buin, Bougainville, AROB   | Chlorosis, stunt                    |
| RID5927           | Nov. 2010        | Buin, Bougainville, AROB          | Fiji leaf gall only                 |
| RID5957           | Nov. 2010        | Nr Kieta, Bougainville, AROB      | Fiji leaf gall only                 |
| RID6137           | June 2011        | Goroka, EHP                       | Mosaic, blotch, galls               |
| RID6138           | June 2011        | Goroka, EHP                       | Fiji leaf gall only                 |
| RID6157           | June 2011        | Minj, WHP                         | Fiji leaf gall only                 |
| RID6198           | June 2011        | Margarima Station, SHP            | Chlorosis, stunt                    |
| MPW807            | Sept. 2002       | Kobremnim, SP                     | Galls                               |
| RID6457           | Oct. 2012        | Aitape, SP                        | Fiji leaf gall only                 |
| RID6488           | Nov. 2012        | Green River, SP                   | Chlorosis and stunt                 |
| RID6499           | Nov. 2012        | Amanab, SP                        | Fiji leaf gall only                 |
| RID6624           | May 2014         | Aiyura, EHP                       | Fiji leaf gall only                 |
| RID6640           | May 2014         | Osaro River, EHP                  | Fiji leaf gall only                 |
| RID7028           | May 2015         | Ningerum, WP                      | Chlorotic streaks                   |
| RID7065           | May 2015         | Daru, WP                          | Chlorotic streaks                   |
| RID7076           | May 2015         | Daru, WP                          | Stunt                               |
|                   |                  | <b>Torres Strait</b>              |                                     |
| LMJ115            | June 2007        | Dauan Is.                         | Mosaic                              |
| LMJ117            | June 2007        | Yorke Is.                         | Chlorotic streaks                   |
| RID5203           | Aug. 2008        | Boigu Is.                         | General stunting                    |
| RID5280           | Feb. 2009        | Badu Is.                          | None                                |
| RID5297           | March 2009       | Dauan Is.                         | Slight stunt                        |
| RID5303           | March 2009       | Saibai Is.                        | Slight stunt                        |
| RID5661           | March 2010       | Dauan Is.                         | Chlorotic blotch                    |
| RID5683           | March 2010       | Coconut Is.                       | Chimaera –like streaks              |
| RID5688           | March 2010       | Moa Is.                           | Yellow on green mosaic              |
| RID5805           | June 2010        | Boigu Is.                         | Chlorotic flecks                    |
| LMJ359            | March 2011       | Boigu Is.                         | Puckering                           |

|         |            |                     |                            |
|---------|------------|---------------------|----------------------------|
| RID6243 | Aug. 2011  | Coconut Is.         | Slight chlorotic streak    |
| RID6245 | Aug. 2011  | Warraber Is.        | Chlorotic streak, stunt    |
|         |            | <b>Mainland Qld</b> |                            |
| RID5690 | April 2010 | Bamaga, NPA, CYP    | Chlorotic blotch           |
| LMJ469  | March 2013 | Aytonvale, CYP,     | Pokkah Boeng               |
| RID6980 | April 2015 | Bamaga, NPA, CYP    | Chimaera chlorotic streaks |

Leaf samples were tested using RT-PCR and primers with homology to tenuivirus RNA [27, 30] by Sugar Research Australia, Indooroopilly, Queensland, Australia.

<sup>A</sup> AROB: Autonomous region of Bougainville, CYP: Cape York Peninsula, EHP: Eastern Highlands Province, NPA: Northern Peninsula Area, SHP: Southern Highlands Province, SP: Sandaun Province, WHP: Western Highlands Province, WP: Western Province.



**Table S3. Banana leaf samples collected on PNG surveys and indexed negative for banana bunchy top virus**

37

| Collection number | Approx. date | Genome group | Approximate Location <sup>A</sup> | Symptoms                    |
|-------------------|--------------|--------------|-----------------------------------|-----------------------------|
| RID 4800          | Oct. 2007    | AAA          | Wewak, ESP                        | Upright growth habit        |
| RID 4863          | Oct. 2007    | AAB          | Waininge, SP                      | Upright growth habit        |
| RID 5083          | June 2008    | AAB          | Suki, WP                          | Upright growth habit        |
| RID 5107          | June 2008    | ABB          | Tarakbits, WP                     | Upright growth habit        |
| RID 5409          | June 2009    | AAA          | Vanimo, SP                        | Upright growth habit        |
| RID 5415          | June 2009    | AAB          | Wutung, SP                        | Upright growth habit        |
| RID 5416          | June 2009    | AAB          | Wutung, SP                        | Upright growth habit        |
| RID 5427          | June 2009    | AAB          | Wutung, SP                        | Upright growth habit        |
| RID 5441          | June 2009    | AAB          | Somboi, Bewani, SP                | Upright growth habit        |
| RID 5443          | June 2009    | AAA          | Skotio, Bewani, SP                | Upright growth habit        |
| RID 5452          | June 2009    | AAB          | Green River, SP                   | Upright growth habit        |
| RID 5509          | June 2009    | AAA          | Yangora, ESP                      | Upright growth habit        |
| RID 6294          | Oct. 2011    | AAA          | Sesareme, WP                      | Upright growth habit        |
| RID 6297          | Oct. 2011    | AAA          | Kamusi, WP                        | Slight upright growth habit |
| RID 6275          | Oct. 2011    | AAA          | Lake Murray, WP                   | Chlorosis and upright habit |
| RID 6284          | Oct. 2011    | AAA          | Wereave, WP                       | Chlorosis and upright habit |
| RID 6285          | Oct. 2011    | ABB          | Tambarai, WP                      | Slight upright growth habit |
| RID 6289          | Oct. 2011    | ABB          | Balamuk, WP                       | Slight upright growth habit |
| RID 6456          | Oct. 2012    | ABB          | Poros, SP                         | Slight upright growth habit |
| RID 6468          | Oct. 2012    | ABB          | Nr Poin, SP                       | Slight upright growth habit |
| RID 6470          | Oct. 2012    | ABB          | Wutung, SP                        | Slight upright growth habit |
| RID 6476          | Oct. 2012    | AAA          | Ituli, SP                         | Slight upright growth habit |
| RID 6478          | Oct. 2012    | AAA          | Skotio, SP                        | Slight upright growth habit |
| RID 6487          | Oct. 2012    | AAB          | Green River, SP                   | Slight upright growth habit |
| RID 6493          | Oct. 2012    | AAA          | Yapsi, SP                         | Slight upright growth habit |
| RID 6496          | Oct. 2012    | AAB          | Amanab, SP                        | Slight upright growth habit |
| RID 6709          | May 2014     | ABB          | Mt Hagen, WHP                     | Slight upright growth habit |
| RID 6691          | May 2014     | ABB          | Banz, JP                          | Slight upright growth habit |
| RID 6679          | May 2014     | ABB          | Minj, JP                          | Slight upright growth habit |
| RID 6674          | May 2014     | AAA          | Kebamuk, CP                       | Slight upright growth habit |
| RID 6658          | May 2014     | AAA          | Mt Wilhelm, CP                    | Slight upright growth habit |
| RID 6641          | May 2014     | AAB          | Asaro River EHP                   | Slight upright growth habit |
| RID 7011          | May 2015     | AAA          | Tabubil, WP                       | Slight upright growth habit |
| RID 7263          | April 2016   | AAA          | Vanimo, SP                        | Slight upright growth habit |
| RID 7269          | April 2016   | AAA          | Musu, SP                          | Slight upright growth habit |
| RID7274B          | April 2016   | AAA          | Lido, SP                          | Slight upright growth habit |
| RID 7293          | April 2016   | ABB          | Imbine, SP                        | Slight upright growth habit |

|          |            |     |                 |                             |
|----------|------------|-----|-----------------|-----------------------------|
| RID 7294 | April 2016 | ABB | Imbine, SP      | Slight upright growth habit |
| RID 7300 | April 2016 | AAA | Skotiaoh SP     | Slight upright growth habit |
| RID 7741 | Nov. 2017  | ABB | Dugur, ESP      | Slight upright growth habit |
| RID 7750 | Nov. 2017  | AAB | Moem, ESP       | Slight upright growth habit |
| RID 7772 | Nov. 2017  | ABB | Wewak, ESP      | Choke throat                |
| MA104    | Nov. 2017  | AAB | Old Mawatta, WP | NA                          |

All samples tested negative by double antibody sandwich enzyme linked immunosassay (DAS-ELISA) using Agdia (Elkhart Inc., USA) reagent sets and procedures and chemical preparations similar to those described in[4] for banana bunchy top virus (BBTV).

<sup>A</sup> EHP: Eastern Highlands Province, ESP: East Sepik Province, JP: Jiwaka Province, SP: Sandaun Province, CP: Chimbu Province, WP: Western Province, WHP: Western Highlands Province.

**Table S4. Sugarcane samples indexed positive for Fiji leaf gall disease virus**

| Collection number | Approximate date | Approximate location <sup>A</sup> |
|-------------------|------------------|-----------------------------------|
| MPW807            | Sept. 2002       | Kobremnim, SP                     |
| RID5910           | Nov. 2010        | Bougainville, AROB                |
| RID5882           | Nov. 2010        | Buka, AROB                        |
| RID5883           | Nov. 2010        | Buka, AROB                        |
| RID5927           | Nov. 2010        | Buin, Bougainville, AROB          |
| RID5957           | Nov. 2010        | Nr Kieta, Bougainville, AROB      |
| RID6138           | June 2011        | Goroka, EHP                       |
| RID6157           | June 2011        | Minj, WHP                         |
| RID6457           | Oct. 2012        | Aitape, SP                        |
| RID6499           | Nov. 2012        | Amanab, SP                        |
| RID6624           | May 2014         | Aiyura, EHP                       |
| RID6640           | May 2014         | Osaro River, EHP                  |

Leaf samples were tested using RT-PCR modified from [5] by Sugar Research Australia, Indooroopilly, Queensland, Australia.

<sup>A</sup>AROB: Autonomous Region of Bougainville, EHP: Eastern Highlands Province, SP: Sandaun Province, WHP: Western Highlands Province.

**Table S5. Negative HLB PCR test records from PNG**

51

| Collection |            |                       |          |           |                               |
|------------|------------|-----------------------|----------|-----------|-------------------------------|
| No.        | Date       | Location <sup>A</sup> | Latitude | Longitude | Tree identity                 |
| MPW1273    | Sept. 2004 | Wutung, SP            | -2.61165 | 141.0121  | <i>Citrus sp.</i>             |
| MPW1270    | Sept. 2004 | Hap Hap, SP           | -2.72305 | 141.2652  | <i>Citrus maxima</i>          |
| MPW1271    | Sept. 2004 | Wutung, SP            | -2.60828 | 141.0045  | <i>Citrus reticulata</i>      |
| MPW1272    | Sept. 2004 | Wutung, SP            | -2.60828 | 141.0045  | <i>Citrus reticulata</i>      |
| MPW1280    | Sept. 2004 | Ningera, SP           | -2.73997 | 141.4407  | <i>Citrus x aurantiifolia</i> |
| MPW1279    | Sept. 2004 | Ningera, SP           | -2.73997 | 141.4407  | <i>Citrus japonica</i>        |
| MPW1285    | Sept. 2004 | Blackwater, SP        | -2.77392 | 141.3893  | <i>Citrus sp.</i>             |
| MPW1291    | Sept. 2004 | Dapu, SP              | -2.70808 | 141.3271  | <i>Citrus sp.</i>             |
| MPW1291    | Sept. 2004 | Dapu, SP              | -2.70808 | 141.3271  | <i>Citrus sp.</i>             |
| MPW1301    | Sept. 2004 | Vanimo, SP            | -2.7049  | 141.3037  | <i>Citrus x aurantium</i>     |
| MPW1301    | Sept. 2004 | Vanimo, SP            | -2.7049  | 141.3037  | <i>Citrus x aurantium</i>     |
| MPW1298    | Sept. 2004 | Vanimo, SP            | -2.70327 | 141.3038  | <i>Citrus x limon</i>         |
| MPW1288    | Sept. 2004 | Wusipi, SP            | -2.72477 | 141.3406  | <i>Citrus x aurantium</i>     |
| MPW1300    | Sept. 2004 | Vanimo, SP            | -2.70378 | 141.3039  | <i>Citrus x aurantiifolia</i> |
| MPW1289    | Sept. 2004 | Wusipi, SP            | -2.72515 | 141.3407  | <i>Citrus x limon</i>         |
| MPW1289    | Sept. 2004 | Wusipi, SP            | -2.72515 | 141.3407  | <i>Citrus x limon</i>         |
| MPW1304    | Sept. 2004 | Dapu, SP              | -2.82507 | 141.3282  | <i>Citrus x limon</i>         |
| MPW1311    | Sept. 2004 | Vanimo, SP            | -2.67782 | 141.3083  | <i>Citrus japonica</i>        |
| MPW1325    | Sept. 2004 | Vanimo, SP            | -2.68443 | 141.305   | <i>Citrus sp.</i>             |
| MPW1313    | Sept. 2004 | Vanimo, SP            | -2.67738 | 141.3045  | <i>Citrus sp.</i>             |
| MPW1275    | Sept. 2004 | Ningera, SP           | -2.72715 | 141.3856  | <i>Citrus japonica</i>        |
| MPW1294    | Sept. 2004 | Dapu, SP              | -2.70823 | 141.3281  | <i>Citrus sp.</i>             |
| MPW1331    | Sept. 2004 | Aitape, SP            | -3.15133 | 142.3658  | <i>Citrus reticulata</i>      |
| MPW1327    | Sept. 2004 | Aitape, SP            | -3.17647 | 142.3989  | <i>Citrus reticulata</i>      |
| MPW1328    | Sept. 2004 | Aitape, SP            | -3.12507 | 142.3087  | <i>Citrus reticulata</i>      |
| MPW1329    | Sept. 2004 | Aitape, SP            | -3.12507 | 142.3087  | <i>Citrus x aurantium</i>     |
| MPW1335    | Sept. 2004 | Ituli, SP             | -3.02465 | 141.1379  | <i>Citrus reticulata</i>      |
| MPW1344    | Sept. 2004 | Yako, SP              | -2.61893 | 141.0909  | <i>Citrus sp.</i>             |
| MPW1343    | Sept. 2004 | Mushu, SP             | -2.62765 | 141.1018  | <i>Citrus sp.</i>             |
| MPW1338    | Sept. 2004 | Wutung, SP            | -2.60645 | 141.0055  | <i>Citrus x aurantiifolia</i> |
| MPW1340    | Sept. 2004 | Wutung, SP            | -2.60645 | 141.0055  | <i>Citrus x aurantiifolia</i> |
| JR174      | Nov. 2006  | Lowan ESP             | -3.38528 | 143.1781  | <i>Citrus sp.</i>             |
| JR183      | Nov. 2006  | Aitape, SP            | -3.13194 | 142.3356  | <i>Citrus sp.</i>             |
| JR182      | Nov. 2006  | Wewak, ESP            | -3.54826 | 143.627   | <i>Citrus sp.</i>             |
| JR180      | Nov. 2006  | Moem, ESP             | -3.56612 | 143.6974  | <i>Citrus sp.</i>             |
| JR206      | Nov. 2006  | Vanimo, SP            | -2.67861 | 141.3072  | <i>Citrus sp.</i>             |
| JR207      | Nov. 2006  | Vanimo, SP            | -2.67861 | 141.3072  | <i>Citrus sp.</i>             |
| JR205      | Nov. 2006  | Vanimo, SP            | -2.66889 | 141.2561  | <i>Citrus sp.</i>             |
| JR199      | Nov. 2006  | Wutung, SP            | -2.6692  | 141.3081  | <i>Citrus sp.</i>             |

|         |           |                |          |          |                               |
|---------|-----------|----------------|----------|----------|-------------------------------|
| JR190   | Nov. 2006 | Yako, SP       | -2.63361 | 141.185  | <i>Citrus</i> sp.             |
| JR191   | Nov. 2006 | Yako, SP       | -2.63361 | 141.185  | <i>Citrus</i> sp.             |
| JR194   | Nov. 2006 | Wutung, SP     | -2.61361 | 141.0075 | <i>Citrus</i> sp.             |
| JR193   | Nov. 2006 | Wutung, SP     | -2.61361 | 141.0075 | <i>Citrus reticulata</i>      |
| JR198   | Nov. 2006 | Wutung, SP     | -2.60509 | 141.0017 | <i>Citrus</i> sp.             |
| JR213   | Nov. 2006 | Wusipi, SP     | -2.73    | 141.345  | <i>Citrus</i> sp.             |
| JR211   | Nov. 2006 | Samboi, SP     | -3.05583 | 141.1683 | <i>Citrus</i> sp.             |
| JR217   | Nov. 2006 | Amanab, SP     | -3.59083 | 141.202  | <i>Citrus x aurantiifolia</i> |
| JR226   | Nov. 2006 | Telefomin, SP  | -5.15972 | 141.6183 | <i>Citrus</i> sp.             |
| RID4795 | Oct. 2007 | Moem, ESP      | -3.5663  | 143.6973 | <i>Citrus</i> sp.             |
| RID4792 | Oct. 2007 | Moem, ESP      | -3.56652 | 143.6973 | <i>Citrus</i> sp.             |
| RID4818 | Oct. 2007 | Haniak, ESP    | -3.74428 | 143.5013 | <i>Citrus reticulata</i>      |
| RID4837 | Oct. 2007 | Aitape, SP     | -3.57365 | 142.6172 | <i>Citrus japonica</i>        |
| RID4838 | Oct. 2007 | Aitape, SP     | -3.57365 | 142.6172 | <i>Citrus maxima</i>          |
| RID4845 | Oct. 2007 | Ulau, SP       | -3.30952 | 142.7923 | <i>Citrus japonica</i>        |
| RID4852 | Oct. 2007 | Aitape, SP     | -3.1679  | 142.3595 | <i>Citrus x aurantium</i>     |
| RID4862 | Oct. 2007 | Wauningi, SP   | -3.20363 | 142.1957 | <i>Citrus x limon</i>         |
| RID4873 | Oct. 2007 | Aitape, SP     | -3.12562 | 142.3468 | <i>Citrus x aurantium</i>     |
| RID5021 | June 2008 | Daru, WP       | -9.0737  | 143.212  | <i>Citrus reticulata</i>      |
| RID5151 | June 2008 | Tabubil, WP    | -5.29    | 141.2333 | <i>Citrus reticulata</i>      |
| RID5381 | June 2009 | Vanim, SP      | -2.68583 | 141.3039 | <i>Citrus japonica</i>        |
| RID5383 | June 2009 | Vanim, SP      | -2.69023 | 141.303  | <i>Citrus japonica</i>        |
| RID5408 | June 2009 | Vanim, SP      | -2.68471 | 141.3062 | <i>Citrus japonica</i>        |
| RID5406 | June 2009 | Vanim, SP      | -2.68471 | 141.3062 | <i>Citrus x limon</i>         |
| RID5400 | June 2009 | Lido SP        | -2.6626  | 141.277  | <i>Citrus japonica</i>        |
| RID5397 | June 2009 | Lido SP        | -2.6633  | 141.2767 | <i>Citrus</i> sp.             |
| RID5405 | June 2009 | Lido SP        | -2.66554 | 141.2682 | <i>Citrus</i> sp.             |
| RID5402 | June 2009 | Lido SP        | -2.66171 | 141.2769 | <i>Citrus x aurantiifolia</i> |
| RID5393 | June 2009 | Lido SP        | -2.664   | 141.2262 | <i>Citrus x aurantiifolia</i> |
| RID5396 | June 2009 | Lido SP        | -2.664   | 141.2262 | <i>Citrus japonica</i>        |
| RID5429 | June 2009 | Yako, SP       | -2.63371 | 141.194  | <i>Citrus x limon</i>         |
| RID5466 | June 2009 | Telefomin, SP  | -5.13764 | 141.6251 | <i>Citrus japonica</i>        |
| RID5457 | June 2009 | Vanim, SP      | -2.69126 | 141.2981 | <i>Citrus japonica</i>        |
| RID5460 | June 2009 | Vanim, SP      | -2.69126 | 141.2981 | <i>Citrus x limon</i>         |
| RID5458 | June 2009 | Vanim, SP      | -2.69159 | 141.2995 | <i>Citrus maxima</i>          |
| RID5478 | June 2009 | Pasi, SP       | -2.73659 | 141.342  | <i>Citrus x limon</i>         |
| RID5491 | June 2009 | Dapu, SP       | -2.70812 | 141.3268 | <i>Citrus japonica</i>        |
| RID5469 | June 2009 | Blackwater, SP | -2.77386 | 141.3907 | <i>Citrus x limon</i>         |
| RID5489 | June 2009 | Warastone, SP  | -2.71382 | 141.3389 | <i>Citrus japonica</i>        |
| RID5486 | June 2009 | Warastone, SP  | -2.71361 | 141.3386 | <i>Citrus x limon</i>         |
| RID5483 | June 2009 | Wusipi, SP     | -2.72515 | 141.3407 | <i>Citrus x limon</i>         |
| RID5493 | June 2009 | Vanim, SP      | -2.68112 | 141.3067 | <i>Citrus x limon</i>         |

|         |            |                        |          |          |                           |
|---------|------------|------------------------|----------|----------|---------------------------|
| RID5505 | June 2009  | Hogi, ESP<br>Yangorum, | -3.4133  | 143.3866 | <i>Citrus japonica</i>    |
| RID5514 | June 2009  | ESP                    | -3.65638 | 143.2967 | <i>Citrus x limon</i>     |
| RID5525 | June 2009  | Wewak, ESP             | -3.5748  | 143.6169 | <i>Citrus maxima</i>      |
| RID5522 | June 2009  | Kongen, ESP            | -3.61024 | 143.7163 | <i>Citrus japonica</i>    |
| RID5629 | June 2009  | Alotau, MBP            | -10.3082 | 150.4484 | <i>Citrus</i> sp.         |
| RID6102 | June 2009  | Nadzab, MoP            | -6.6833  | 147.1    | <i>Citrus</i> sp.         |
| RID6168 | June 2009  | Dar MS, SHP            | -6.24529 | 143.552  | <i>Citrus reticulata</i>  |
| RID6252 | June 2009  | Samagos, WP            | -6.09361 | 141.3072 | <i>Citrus reticulata</i>  |
| RID6292 | June 2009  | Wando, WP              | -8.88907 | 141.2593 | <i>Citrus maxima</i>      |
| RID6296 | June 2009  | Kamusi, WP             | -7.42442 | 143.1228 | <i>Citrus x limon</i>     |
| RID6453 | Oct. 2012  | Wewak, ESP             | -3.7196  | 143.5963 | <i>Citrus reticulata</i>  |
| RID6465 | Oct. 2012  | Wogan, SP              | -3.12503 | 142.1309 | <i>Citrus reticulata</i>  |
| RID6462 | Oct. 2012  | Poru, SP               | -3.19967 | 142.1889 | <i>Citrus reticulata</i>  |
| RID6473 | Nov. 2012  | Wutung, SP             | -2.62984 | 141.1354 | <i>Citrus maxima</i>      |
| RID6472 | Nov. 2012  | Wutung, SP             | -2.60643 | 141.0055 | <i>Citrus reticulata</i>  |
| RID6480 | Nov. 2012  | Passi, SP              | -2.7356  | 141.3414 | <i>Citrus maxima</i>      |
| RID6495 | Nov. 2012  | Amanab, SP             | -3.58576 | 141.216  | <i>Citrus x limon</i>     |
| RID6500 | Nov. 2012  | Lido, SP               | -2.66436 | 141.2774 | <i>Citrus</i> sp.         |
| RID6501 | Nov. 2012  | Lido, SP               | -2.66436 | 141.2774 | <i>Citrus x limon</i>     |
| RID6502 | Nov. 2012  | Lido, SP               | -2.66436 | 141.2774 | <i>Citrus x limon</i>     |
| RID6537 | May 2013   | Daru, WP               | -9.0737  | 143.212  | <i>Citrus maxima</i>      |
| RID6652 | May 2014   | Kabiufa, EHP           | -5.99062 | 145.3783 | <i>Citrus reticulata</i>  |
| RID6639 | May 2014   | Osaro, EHP             | -5.97596 | 145.2777 | <i>Citrus reticulata</i>  |
| RID6656 | May 2014   | Ku, CP                 | -6.04516 | 145.018  | <i>Citrus</i> sp.         |
| RID6675 | June 2014  | Minj, JP               | -5.88307 | 144.6829 | <i>Citrus reticulata</i>  |
|         |            | Ningerum,              |          |          |                           |
| RID7025 | May 2015   | WP                     | -5.72144 | 141.105  | <i>Citrus reticulata</i>  |
| RID7041 | May 2015   | Aiambak, WP            | -7.34794 | 141.2674 | <i>Citrus</i> sp.         |
| RID7067 | May 2015   | Daru, WP               | -9.06938 | 143.2132 | <i>Citrus x aurantium</i> |
| MA05    | March 2017 | Buji, WP               | -9.15089 | 142.2355 | <i>Citrus</i> sp.         |
| MA13    | March 2017 | Bula, WP               | -9.12803 | 141.3415 | <i>Citrus</i> sp.         |
| MA09    | March 2017 | Jarai, WP              | -9.19783 | 141.5841 | <i>Citrus</i> sp.         |
|         |            | Tinputz,               |          |          |                           |
| LMJ1220 | Sept. 2018 | AROB                   | -5.5552  | 155.0079 | <i>Citrus</i> sp.         |

<sup>A</sup>AROB: Autonomous Region of Bougainville, CP: Chimbu Province, EHP: Eastern Highlands Province, ESP: East Sepik Province, JP: Jiwaka Province, MaP: Madang Province, MoP: Morobe Province, MBP: Milne Bay Province, SP: Sandaun Province, SHP: Southern Highlands Province, WP: Western Province

Each sample consisted of desiccated petioles and midribs and DNA was extracted, using either Qiagen DNeasy plant or Bioline Isolate II Plant DNA kits. They were tested in a multiplex PCR reaction using the primers A2/J5 [6] to detect ‘*Ca. Liberibacter*’ and primers rP1/fD1 [7] which amplifying 16SrDNA of other bacteria present in DNA preparations to

---

verify the PCR-competency of each individual reaction mixture. GPS coordinates are provided to indicate breadth of 58  
coverage across locations intensively surveyed. 59

60

61

**Table S6. Palm samples collected from outside known BCS affected areas that indexed negative for phytoplasma in PCR testing**

| Collection No. | Approx. date | Location <sup>A</sup>            | Latitude | Longitude | Palm                       |
|----------------|--------------|----------------------------------|----------|-----------|----------------------------|
| RID4831        | Oct. 2007    | Aitape, SP                       | -3.57365 | 142.6172  | <i>Cocos nucifera</i>      |
| RID4834        | Oct. 2007    | Aitape, SP                       | -3.57365 | 142.6172  | <i>Cocos nucifera</i>      |
| RID5114        | June 2008    | Tarakbits, WP                    | -5.60925 | 141.0439  | <i>Areca catechu</i>       |
| RID5581        | Oct. 2009    | Gusap, MoP                       | -5.95663 | 145.8808  | <i>Cocos nucifera</i>      |
| RID5575        | Oct. 2009    | Muzing, MoP                      | -6.36744 | 146.3154  | <i>Cocos nucifera</i>      |
| RID5885        | Nov. 2010    | Buka Is. AROB                    | -5.4181  | 154.6259  | <i>Cocos nucifera</i>      |
| RID5988        | Nov. 2010    | Sanakoba, Bougainville Is., AROB | -5.45417 | 154.7607  | <i>Areca catechu</i>       |
| RID6254        | Oct. 2011    | Manoia, WP                       | -5.95306 | 141.3592  | <i>Metroxylon sagu</i>     |
| RID6257        | Oct. 2011    | Manoia, WP                       | -5.95306 | 141.3592  | <i>Metroxylon sagu</i>     |
| RID6494        | Nov. 2012    | Yapsi, SP                        | -4.62881 | 141.0957  | <i>Cocos nucifera</i>      |
| RID6459        | Nov. 2012    | Poro, SP                         | -3.19889 | 142.1875  | <i>Cocos nucifera</i>      |
| RID6712        | May 2014     | Six mile, Port Moresby, NCD      | -5.91656 | 143.9226  | <i>Elaeis guineensis</i>   |
| RID6713        | May 2014     | Six mile, Port Moresby, NCD      | -5.91656 | 143.9226  | <i>Elaeis guineensis</i>   |
| RID7032        | May 2015     | Ningerum, WP                     | -5.71871 | 141.1093  | <i>Hydriastele costata</i> |
| RID7050        | May 2015     | Debepari, WP                     | -6.30835 | 141.9056  | <i>Hydriastele costata</i> |
| RID7054        | May 2015     | Morehead, WP                     | -8.71271 | 141.6422  | <i>Cocos nucifera</i>      |
| RID7048        | May 2015     | Debepari, WP                     | -6.30835 | 141.9056  | <i>Cocos nucifera</i>      |
| RID7049        | May 2015     | Debepari, WP                     | -6.30835 | 141.9056  | <i>Cocos nucifera</i>      |
| GUN-WG S1D1    | Sept. 2016   | Gunjangi, ESP                    |          |           | <i>Cocos nucifera</i>      |
| GUN-WG S1D2    | Sept. 2016   | Gunjangi, ESP                    |          |           | <i>Cocos nucifera</i>      |
| NAN-AD S3D1    | Sept. 2016   | Nanaha, ESP                      |          |           | <i>Cocos nucifera</i>      |
| NAN-AD S3D1    | Sept. 2016   | Nanaha, ESP                      |          |           | <i>Cocos nucifera</i>      |
| MA07           | March 2017   | Bula, WP                         | -9.12802 | 141.3413  | <i>Cocos nucifera</i>      |
| MA45           | March 2017   | Mabaduan, WP                     | -9.27773 | 142.7341  | <i>Cocos nucifera</i>      |
| MA38           | March 2017   | Mari, WP                         | -9.19492 | 141.7041  | <i>Cocos nucifera</i>      |
| RID7702        | Nov. 2017    | Brahman, MaP                     | -5.75613 | 145.3625  | <i>Cocos nucifera</i>      |
| RID7703        | Nov. 2017    | Brahman, MaP                     | -5.75608 | 145.3626  | <i>Cocos nucifera</i>      |
| RID7704        | Nov. 2017    | Brahman, MaP                     | -5.75621 | 145.3633  | <i>Cocos nucifera</i>      |
| RID7705        | Nov. 2017    | Brahman, MaP                     | -5.75662 | 145.3633  | <i>Cocos nucifera</i>      |
| RID7706        | Nov. 2017    | Brahman, MaP                     | -5.75643 | 145.3634  | <i>Cocos nucifera</i>      |
| RID7707        | Nov. 2017    | Brahman, MaP                     | -5.75651 | 145.3633  | <i>Cocos nucifera</i>      |
| RID7732        | Nov. 2017    | Maprik, ESP                      | -3.67706 | 143.8291  | <i>Cocos nucifera</i>      |

62

63

|         |             |                                       |          |          |                            |
|---------|-------------|---------------------------------------|----------|----------|----------------------------|
| RID7733 | Nov. 2017   | Maprik, ESP                           | -3.67706 | 143.8291 | <i>Cocos nucifera</i>      |
| RID7749 | Nov. 2017   | Angoram, ESP                          | -4.05784 | 144.0704 | <i>Cocos nucifera</i>      |
| RID7749 | Nov. 2017   | Angoram, ESP                          | -4.05784 | 144.0704 | <i>Hydriastele costata</i> |
| LMJ1216 | Sept. 2018  | Teperoi, Bougainville Is.<br>AROB     | -5.90623 | 155.2787 | <i>Cocos nucifera</i>      |
| LMJ1253 | Sept. 2018  | Kiriwa, Bougainville Is., AROB        | -6.72416 | 155.4793 | <i>Cocos nucifera</i>      |
| LMJ1230 | Sept. 2018  | Toiomanapu, Bougainville Is.,<br>AROB | -6.45874 | 155.855  | <i>Cocos nucifera</i>      |
| LMJ1227 | Sept. 2018  | Toiomanapu, Bougainville Is.,<br>AROB | -6.45849 | 155.8554 | <i>Cocos nucifera</i>      |
| WNB1*   | April 2018  | Makuar, WNB                           |          |          | <i>Cocos nucifera</i>      |
| WNB2*   | April 2018  | Makuar, WNB                           |          |          | <i>Cocos nucifera</i>      |
| WNB3A*  | April 2018  | Airagilpua, WNB                       |          |          | <i>Cocos nucifera</i>      |
| WNB3B*  | April 2018  | Airagilpua, WNB                       |          |          | <i>Cocos nucifera</i>      |
| WNB4*   | April, 2018 | Almango, WNB                          |          |          | <i>Cocos nucifera</i>      |
| WNB5*   | April 2018  | Ongaea, WNB                           |          |          | <i>Areca catechu</i>       |
| WNB6*   | April 2018  | Ongaea, WNB                           |          |          | <i>Areca catechu</i>       |
| WNB7*   | April 2018  | Ongaea, WNB                           |          |          | <i>Cocos nucifera</i>      |
| WNB8*   | April 2018  | Gloucester, WNB                       |          |          | <i>Cocos nucifera</i>      |
| WNB9*   | April 2018  | Walai, WNB                            |          |          | <i>Cocos nucifera</i>      |
| WNB10*  | April 2018  | Dagi, WNB                             |          |          | <i>Cocos nucifera</i>      |
| WNB11*  | April 2018  | Dagi, WNB                             |          |          | <i>Areca catechu</i>       |
| WNB13*  | April 2018  | Sarakolok, WNB                        |          |          | <i>Cocos nucifera</i>      |
| WNB14*  | April 2018  | Sarakolok, WNB                        |          |          | <i>Areca catechu</i>       |
| MA289*  | Nov. 2018   | Gidobada, CP                          |          |          | <i>Cocos nucifera</i>      |
| MA287*  | Nov. 2018   | Loga Makana, CP                       |          |          | <i>Cocos nucifera</i>      |
| MA284*  | Nov. 2018   | Saroa Keina, CP                       |          |          | <i>Cocos nucifera</i>      |
| MA286*  | Dec. 2018   | Ganai, CP                             |          |          | <i>Hydriastele costata</i> |
| MA285*  | Dec. 2018   | N/A, CP                               |          |          | <i>Areca catechu</i>       |
| MA288*  | Dec. 2018   | N/A, CP                               |          |          | <i>Areca catechu</i>       |
| MA290*  | Dec. 2018   | N/A, CP                               |          |          | <i>Areca catechu</i>       |
| MA388*  | Nov. 2019   | Tugiyag, Rai Coast, MaP               |          |          | <i>Cocos nucifera</i>      |
| MA342*  | Nov. 2019   | Dumbal, Rai Coast, MaP                |          |          | <i>Cocos nucifera</i>      |
| MA341*  | Nov. 2019   | Ganglau, Rai Coast, MaP               |          |          | <i>Areca catechu</i>       |
| MA347*  | Nov. 2019   | Ganglau, Rai Coast, MaP               |          |          | <i>Areca catechu</i>       |
| LS33*   | Nov. 2019   | Namatanai, NIP                        |          |          | <i>Cocos nucifera</i>      |
|         |             |                                       |          |          |                            |

<sup>A</sup>AROB: Autonomous Region of Bougainville, CP: Central Province, ESP: East Sepik Province, MaP: Madang Province, MoP: Morobe Province, NCD: National Capital District, NIP: New Ireland Province, SP: Sandaun Province, WNB: West New Britain Province, WP: Western Province

64

65

66



Each sample consisted of internal lower trunk or meristematic tissues collected and indexed by nested PCR in Australia as described in [79]. Samples labelled ‘\*’ were indexed in New Zealand using generic phytoplasma primers by the New Zealand Ministry for Primary Industries Plant Health and Environment Laboratory. GPS coordinates are provided to indicate breadth of coverage across locations intensively surveyed. GPS coordinates are provided, where available, to indicate breadth of coverage across locations intensively surveyed.

## References

1. Mowat, W.P.; Dawson, S. Detection and identification of plant viruses by ELISA using crude sap extracts and unfractionated antisera. *J. Virol. Methods* **1987**, *15*, 233–247.
2. Marie-Jeanne, V.; Ioose, R.; Peyre, J.; Alliot, B.; Signoret, P. Differentiation of Poaceae potyviruses by reverse transcription-polymerase chain reaction and restriction analysis. *J. Phytopathol.* **2000**, *148*, 141–151.
3. Sharman, M.; Thomas, J.E.; Dietzgen, R.G. Development of a multiplex immunocapture PCR with colourimetric detection for viruses of banana. *J. Virol. Methods* **2000**, *89*, 75–88.
4. Clark, M.F.; Adams, A.N. Characteristics of the microplate method of enzyme-linked immunosorbent assay for the detection of plant viruses. *J. Gen. Virol.* **1977**, *34*, 475–483.
5. Smith, G.R.; Van de Velde, R. Detection of sugarcane mosaic virus and Fiji disease virus using the polymerase chain reaction. *Plant Dis.* **1994**, *78*, 557–561.
6. Hocquellet, A.; Toorawa, P.; Bové, J.-M.; Garnier, M. Detection and identification of the two *Candidatus Liberobacter* species associated with citrus huanglongbing by PCR amplification of ribosomal protein genes of the *i* operon. *Mol. Cell. Probes* **1999**, *13*, 373–379.
7. Weisburg, W.G.; Barns, S.M.; Pelletier, D.A.; Lane, D.J. 16S ribosomal DNA amplification for phylogenetic study. *J. Bacteriol.* **1991**, *173*, 697–703.
